# Supplementary material for: Effects of root exudates of woody species on the soil anti-erodibility in the rhizosphere in a karst region, China
Source: PeerJ. 2017 Mar 1;5:e3029. doi: 10.7717/peerj.3029 (PMC5335692; doi:10.7717/peerj.3029)
Supplement: Supplemental Information 3 [file peerj-05-3029-s003.xlsx]

## Sheet: Figure 1
	the water-stable aggregates of the soils in the rhizospere of the eight tree species
tree species	浓度	Ranges of different particle diameters /%					Mean weight diameter（MWD）
		>2mm	2-1mm	1-0.5mm	0.5-0.25mm	<0.25mm		Geometry mean diameter（GMD）	Exp	Geometry mean diameter（GMD）	Standard deviation	Standard deviation				MWD(mm)							Standard deviation				GMD(mm)							Standard deviation
control	CK1	14.65	17.65	27.22	6.89	33.59	0.871712	0.645046	-0.438433	0.645046					consentrations	CEN	0	1x	2x	3x	0	1x	2x	3x		consentrations	CEN	0	1x	2x	3x	0	1x	2x	3x
	CK2	15.07	15.24	27.87	7.42	34.4	0.85285	0.629021	-0.463591	0.629021					controls	C	0.86				0.01					controls	C	0.64				0.01
	CK3	13.051	17.957	29.309	6.984	32.687	0.8581	0.642275	-0.442738	0.642275					Carpinus pubescens	CP		0.92	0.94	0.96		0.01	0.01	0.03		Carpinus pubescens	CP		0.68	0.72	0.73		0.01	0.02	0.01
	mean	14.257	16.949	28.133	7.098	33.559	0.860887	0.638781	-0.448254	0.638781	0.0097353	0.00856523			Cladrastis platycarpa	CPP		0.94	1.04	1		0.01	0.02	0.01		Cladrastis platycarpa	CPP		0.71	0.78	0.76		0.01	0.02	0.01
Carpinus pubescens	1-1x	18.34	16.95	25.07	8.99	30.65	0.919412	0.677498	-0.389349	0.677498					Zanthoxylum planispinum Sieb.et Zucc.	ZP		0.95	0.93	0.96		0.01	0.01	0.02		Zanthoxylum planispinum Sieb.et Zucc.	ZP		0.72	0.7	0.73		0.0045	0.01	0.02
		18.24	17.43	27.82	7.53	28.98	0.935588	0.698698	-0.358536	0.698698					Ligustrum lucidum	LL		0.93	0.9	0.97		0.03	0.01	0.03		Ligustrum lucidum	LL		0.7	0.68	0.73		0.03	0.0011	0.02
		17.948	17.508	24.723	7.774	32.047	0.916273	0.672842	-0.396245	0.672842					Itea yunnanensis	IY		0.94	0.93	1.03		0.02	0.02	0.05		Itea yunnanensis	IY		0.71	0.71	0.79		0.01	0.02	0.05
	mean	18.176	17.296	25.871	8.098	30.559	0.923758	0.683013	-0.381377	0.683013	0.0103647	0.0137824			Cinnamomum glanduliferum	CGL		0.92	0.95	0.94		0.03	0.01	0.03		Cinnamomum glanduliferum	CGL		0.7	0.73	0.72		0.02	0.01	0.02
	1-2x	14.43	23.22	30.47	6.12	25.76	0.952775	0.73299	-0.310624	0.73299					Cyclobalanopsis gracilis	CG		0.96	0.99	1		0.03	0.03	0.01		Cyclobalanopsis gracilis	CG		0.72	0.75	0.77		0.02	0.02	0.0045
		15.32	21.43	29.67	7.82	25.76	0.9441	0.721744	-0.326085	0.721744					Platycarya longipes	PL		0.91	0.98	0.95		0.01	0.02	0.01		Platycarya longipes	PL		0.7	0.76	0.73		0.0025	0.02	0.01
		15.055	22.028	27.127	7.033	28.757	0.933239	0.703273	-0.35201	0.703273
	mean	14.935	22.226	29.089	6.991	26.759	0.943371	0.719336	-0.329573	0.719336	0.00978849	0.0150039
	1-3x	16.87	19.89	27.89	7.9	27.45	0.943175	0.711288	-0.340678	0.711288
		16.43	21.33	26.3	8.64	27.3	0.94645	0.712843	-0.338494	0.712843
		18.942	21.306	27.314	7.94	24.498	0.994305	0.757004	-0.278386	0.757004
	mean	17.414	20.842	27.168	8.16	26.416	0.96131	0.727045	-0.319186	0.727045	0.0286214	0.0259571
Cladrastis platycarpa	2-1	15.66	22.76	26.83	7.88	26.87	0.95255	0.721703	-0.326142	0.721703
		16.32	20.4	25.66	8.87	28.75	0.929987	0.695209	-0.363543	0.695209
		12.813	24.547	27.514	8.297	26.829	0.929006	0.708844	-0.34412	0.708844
	mean	14.931	22.569	26.668	8.349	27.483	0.937181	0.708585	-0.344602	0.708585	0.0133188	0.0132488
	2-2	20.53	22.12	24.66	6.93	25.76	1.01774	0.767949	-0.264032	0.767949
		19.42	25.23	26.05	6.12	23.18	1.04313	0.802998	-0.219404	0.802998
		21.631	24.383	20.264	7.947	25.775	1.04458	0.782891	-0.244761	0.782891
	mean	20.527	23.911	23.658	6.999	24.905	1.03515	0.784613	-0.242732	0.784613	0.0150962	0.0175876
	2-3	19.32	21.54	25.72	8.1	25.32	0.996075	0.753372	-0.283196	0.753372
		18.34	24.01	26.21	7.22	24.22	1.01115	0.772979	-0.257503	0.772979
		18.779	23.672	22.974	7.603	26.972	0.998906	0.74944	-0.288429	0.74944
	mean	18.813	23.074	24.968	7.641	25.504	1.00204	0.758597	-0.276376	0.758597	0.00801229	0.0126095
Zanthoxylum planispinum Sieb.et Zucc.	3-1	13.87	26.88	23.47	8.53	27.25	0.956738	0.723379	-0.323821	0.723379
		14.86	24.33	24.74	9.43	26.64	0.949663	0.717973	-0.331323	0.717973
		13.618	24.771	26.934	6.727	27.95	0.941031	0.714549	-0.336104	0.714549
	mean	14.116	25.327	25.048	8.229	27.28	0.949144	0.718634	-0.330416	0.718634	0.00786596	0.00445235
	3-2	16.34	18.57	29.52	6.03	29.54	0.923213	0.694179	-0.365025	0.694179
		16	19.39	29.43	6.9	28.28	0.92815	0.701269	-0.354864	0.701269
		15.114	22.988	25.845	7.608	28.445	0.94058	0.707983	-0.345335	0.707983
	mean	15.818	20.316	28.265	6.846	28.755	0.930648	0.701144	-0.355075	0.701144	0.00894906	0.00690283											Figure 1
	3-3	14.22	25.53	27.43	7.5	25.32	0.9645	0.739779	-0.301403	0.739779
		15.78	20.83	28.86	7.35	27.18	0.940012	0.713142	-0.338075	0.713142
		17.688	21.152	28.157	7.65	25.353	0.974287	0.741458	-0.299136	0.741458
	mean	15.896	22.504	28.149	7.5	25.951	0.9596	0.73146	-0.312871	0.73146	0.0176551	0.015886
Ligustrum lucidum	4-1	17.66	16.33	27.57	8.97	29.47	0.912237	0.678946	-0.387214	0.678946
		18.22	16.05	28.8	10.07	26.86	0.926063	0.695856	-0.362613	0.695856
		17.79	19.88	28.926	8.545	24.859	0.965136	0.735114	-0.307729	0.735114
	mean	17.89	17.42	28.432	9.195	27.063	0.934479	0.703305	-0.352519	0.703305	0.0274353	0.0288158
	4-2	18.04	14.36	30.23	8.74	28.63	0.907275	0.679554	-0.386319	0.679554
		17.22	16.82	27.43	9.09	29.44	0.910112	0.677981	-0.388635	0.677981
		16.244	15.032	31.965	9.494	27.265	0.893863	0.677391	-0.389507	0.677391
	mean	17.168	15.404	29.875	9.108	28.445	0.90375	0.678309	-0.388154	0.678309	0.00867956	0.00111796
	4-3	17.65	24.34	25.3	7.82	24.89	0.9994	0.76071	-0.273503	0.76071
		16.2	22.34	26.73	9.29	25.44	0.958012	0.727734	-0.31782	0.727734
		15.413	22.713	26.999	7.217	27.658	0.947656	0.716805	-0.332952	0.716805
	mean	16.421	23.131	26.343	8.109	25.996	0.968356	0.735083	-0.308092	0.735083	0.0273788	0.0228566
Itea yunnanensis	5-1	16.21	20.54	29.31	9.29	24.65	0.948588	0.725047	-0.321519	0.725047
		18.44	18.4	27.23	11.12	24.81	0.95275	0.719699	-0.328923	0.719699
		15.375	20.616	26.827	10.73	26.452	0.92431	0.698402	-0.358961	0.698402
	mean	16.675	19.852	27.789	10.38	25.304	0.941883	0.714382	-0.336468	0.714382	0.0153599	0.0140956
	5-2	13.62	21.67	27.43	11.53	25.75	0.910787	0.693016	-0.366702	0.693016
		14.22	23.09	26.62	9.22	26.85	0.9321	0.706772	-0.347047	0.706772
		14.319	22.449	29.494	9.475	24.263	0.940509	0.723348	-0.323865	0.723348
	mean	14.053	22.403	27.848	10.075	25.621	0.927799	0.707712	-0.345871	0.707712	0.0153204	0.0151875
	5-3	20.34	27.43	23.54	8.26	20.43	1.07685	0.835477	-0.179752	0.835477
		18.22	25.32	25	8.04	23.42	1.0204	0.781535	-0.246495	0.781535
		16.283	24.53	24.912	9.803	24.472	0.978391	0.74472	-0.294747	0.74472
	mean	18.281	25.76	24.484	8.701	22.774	1.02521	0.787244	-0.240331	0.787244	0.0494056	0.0456472
Cinnamomum glanduliferum	6-1	12.53	20.43	31.54	8.17	27.33	0.892562	0.683823	-0.380056	0.683823
		15.32	18.53	30.22	8.95	26.98	0.912013	0.692517	-0.367422	0.692517
		14.105	23.293	28.957	8.056	25.589	0.942855	0.722639	-0.324846	0.722639
	mean	13.985	20.751	30.239	8.392	26.633	0.91581	0.69966	-0.357441	0.69966	0.0253604	0.0203696
	6-2	13.64	24.22	27.39	7.2	27.55	0.9374	0.712773	-0.338592	0.712773
		14.22	25.33	28.01	6.56	25.88	0.963725	0.739023	-0.302426	0.739023
		14.044	24.34	27.958	6.922	26.736	0.948463	0.724026	-0.322928	0.724026
	mean	13.968	24.63	27.786	6.894	26.722	0.949863	0.725274	-0.321315	0.725274	0.0132182	0.0131694
	6-3	15.74	24.28	25.75	10.46	23.77	0.970775	0.741821	-0.298648	0.741821
		14.54	22.65	27.33	9.73	25.75	0.936388	0.712904	-0.338408	0.712904
		14.069	22.103	27.359	9.552	26.917	0.92123	0.698789	-0.358407	0.698789
	mean	14.783	23.011	26.813	9.914	25.479	0.942798	0.717838	-0.331821	0.717838	0.0253869	0.0219362
Cyclobalanopsis gracilis	7-1	22.42	17.36	25.75	6.67	27.8	0.996437	0.741487	-0.299098	0.741487
		19.7	16.92	27.46	6.38	29.54	0.951525	0.707561	-0.345932	0.707561
		15.216	20.512	30.4	6.651	27.221	0.932994	0.710763	-0.341416	0.710763
	mean	19.112	18.264	27.87	6.567	28.187	0.960319	0.719937	-0.328815	0.719937	0.0326232	0.0187314
	7-2	20.12	21.99	26.47	7.66	23.76	1.0189	0.777212	-0.252042	0.777212
		19.43	18.46	29.02	6.65	26.44	0.974187	0.736593	-0.30572	0.736593
		18.668	19.427	29.269	5.601	27.035	0.972874	0.736566	-0.305757	0.736566
	mean	19.406	19.959	28.253	6.637	25.745	0.988654	0.750123	-0.28784	0.750123	0.0262023	0.0234593
	7-3	18.32	22.28	28.34	7.64	23.42	1.00035	0.768117	-0.263813	0.768117
		19.87	19.54	29.42	6.84	24.33	0.997625	0.761813	-0.272055	0.761813
		21.669	18.786	28.343	6.664	24.538	1.01408	0.770511	-0.260701	0.770511
	mean	19.953	20.202	28.701	7.048	24.096	1.00402	0.766814	-0.265523	0.766814	0.00881811	0.0044934
Platycarya longipes	8-1	17.98	17.82	26.84	8.37	28.99	0.932063	0.694672	-0.364315	0.694672
		16.75	18.64	27.54	7.54	29.53	0.92325	0.69013	-0.370875	0.69013
		15.88	19.088	27.844	9.146	28.042	0.917152	0.689984	-0.371088	0.689984
	mean	16.87	18.516	27.408	8.352	28.854	0.924155	0.691595	-0.368759	0.691595	0.00749609	0.00266565
	8-2	12.42	27.74	27.5	8.9	23.44	0.962725	0.746179	-0.29279	0.746179
		13.53	29.54	27.74	7.29	21.9	1.00384	0.785569	-0.241347	0.785569
		14.202	24.743	29.627	7.915	23.513	0.965851	0.748219	-0.290059	0.748219
	mean	13.384	27.341	28.289	8.035	22.951	0.977471	0.759989	-0.274732	0.759989	0.0228873	0.0221761
	8-3	16.22	20.54	30.55	7.94	24.75	0.953275	0.731131	-0.313162	0.731131
		12.42	25.12	29.49	6.82	26.15	0.937325	0.721585	-0.326305	0.721585
		14.722	24.681	27.584	6.645	26.368	0.962374	0.734951	-0.307951	0.734951
	mean	14.454	23.447	29.208	7.135	25.756	0.950991	0.729222	-0.315806	0.729222	0.0126796	0.00688446
