# Supplementary material for: Effects of root exudates of woody species on the soil anti-erodibility in the rhizosphere in a karst region, China
Source: PeerJ. 2017 Mar 1;5:e3029. doi: 10.7717/peerj.3029 (PMC5335692; doi:10.7717/peerj.3029)
Supplement: Supplemental Information 4 [file peerj-05-3029-s004.xlsx]

## Sheet: Figure 2
				No.	tree species	Hydrocarbon	Aggregation statu	dispersion ratio
				1	Cladrastis platycarpa	31.849	62.42	28.69		No.	tree species	Phenolic ether	dispersion coefficient				Total sugar	Aggregation statu	Degree of aggregate	dispersion ratio	dispersion coefficient	Total amino acids	Aggregation statu	Degree of aggregate	dispersion ratio	dispersion coefficient	Phenolic compound	Aggregation statu	Degree of aggregate	dispersion ratio	dispersion coefficient	Free amino acid	Aggregation statu	Degree of aggregate	dispersion ratio	dispersion coefficient
				2	Ilex chinensis	38.882	64.47	24.95		1	Cladrastis platycarpa	9.729	12.08		1	Ligustrum lucidum	1.11	48.63	73.8	41.22	39.29	0.24	48.63	73.8	41.22	39.29	3.39	48.63	73.8	41.22	39.29	12.38	48.63	73.8	41.22	39.29
				3	Rhamnella martinii	44.608	59.68	29.55		2	Ilex chinensis	1.962	22.6		2	Ilex chinensis	1.59	64.47	82.06	24.95	22.6	0.36	64.47	82.06	24.95	22.6	3.02	64.47	82.06	24.95	22.6	16.7	64.47	82.06	24.95	22.6
				4	Toddalia asiatica	48.369	59.03	31.81		3	Rhamnella martinii	2.031	28.73		3	Cinnamomum glanduliferum	1.51	56.69	80.6	34.35	44.69	0.36	56.69	80.6	34.35	44.69	2.76	56.69	80.6	34.35	44.69	12.1	56.69	80.6	34.35	44.69
				5	Swida wilsoniana	41.099	60.49	28.23		4	Toddalia asiatica	20.147	36.06		4	Machilus microcarpa	0.64	59.84	71.31	21.19	29.96	0.39	59.84	71.31	21.19	29.96	1.42	59.84	71.31	21.19	29.96	15.58	59.84	71.31	21.19	29.96
				6	Vitex canescens	36.491	62.58	24.55		5	Swida wilsoniana	3.125	29.12		5	Lithocarpus glaber (Thunb.) Nakai	0.5	33.09	40.81	36.37	27.02	0.33	33.09	40.81	36.37	27.02	0.96	33.09	40.81	36.37	27.02	11.25	33.09	40.81	36.37	27.02
				7	Pyracantha atalantioides	34.897	49.5	42.01		6	Vitex canescens	1.285	12.85		6	Cyclobalanopsis glauca	0.64	35.14	45.14	38.66	26.56	0.41	35.14	45.14	38.66	26.56	1.58	35.14	45.14	38.66	26.56	6.03	35.14	45.14	38.66	26.56
				8	Ilex corallina	44.056	69.42	16.93		7	Pyracantha atalantioides	12.518	15.72		7	Lithocarpus confinis Huang	0.51	40.17	54.16	39.15	22.47	0.25	40.17	54.16	39.15	22.47	0.81	40.17	54.16	39.15	22.47	12.1	40.17	54.16	39.15	22.47
				9	Diospyros cathayensis	49.662	70.49	19.1		8	Ilex corallina	1.122	12.99		8	Diospyros cathayensis	0.86	70.49	84.57	19.1	23.46	0.53	70.49	84.57	19.1	23.46	3.7	70.49	84.57	19.1	23.46	8.46	70.49	84.57	19.1	23.46
				10	Cyclobalanopsis gracilis	31.291	53.09	38.72		9	Diospyros cathayensis	2.381	23.46		9	Cyclobalanopsis gracilis	1.11	53.09	79.87	38.72	39.77	0.84	53.09	79.87	38.72	39.77	3.08	53.09	79.87	38.72	39.77	3.28	53.09	79.87	38.72	39.77
				11	Lindera communis	31.873	48.07	46.99		10	Cyclobalanopsis gracilis	2.041	39.77		10	Itea yunnanensis	1.49	60.78	81.61	29.57	19.51	0.24	60.78	81.61	29.57	19.51	2.71	60.78	81.61	29.57	19.51	17.97	60.78	81.61	29.57	19.51
				12	Ligustrum sinense	29.312	31.85	55.53		11	Lindera communis	3.299	20.69		11	Ilex corallina	1.95	69.42	80.86	16.93	12.99	0.94	69.42	80.86	16.93	12.99	3.13	69.42	80.86	16.93	12.99	9.34	69.42	80.86	16.93	12.99
				13	Diospyros kaki var. silvestris	18.984	60.76	27.93		12	Ligustrum sinense	1.588	22.49		12	Lindera communis	0.8	48.07	83.76	46.99	20.69	0.51	48.07	83.76	46.99	20.69	2.46	48.07	83.76	46.99	20.69	11.16	48.07	83.76	46.99	20.69
				14	Nothopanax davidii	40.236	52	39.65		13	Diospyros kaki var. silvestris	13.578	10.45		13	Mallotus philippensis	0.27	38.82	52.38	40	29.63	0.2	38.82	52.38	40	29.63	0.88	38.82	52.38	40	29.63	7.11	38.82	52.38	40	29.63
				15	Platycarya longipes	37.075	54	36.33		14	Nothopanax davidii	4.794	11.44		14	tea chinensis Hook.et Arn.var.oblonga	0.66	27.97	51.1	61.81	30.56	0.2	27.97	51.1	61.81	30.56	1.24	27.97	51.1	61.81	30.56	13.94	27.97	51.1	61.81	30.56
				16	Carpinus pubescens	37.085	59.19	28.56		15	Platycarya longipes	7.161	25.14		15	Ilex memecylifolia	0.49	22.77	37.35	63.16	31.34	0.3	22.77	37.35	63.16	31.34	1.61	22.77	37.35	63.16	31.34	9.72	22.77	37.35	63.16	31.34
				17	Cinnamomum glanduliferum	26.105	56.69	34.35		16	Carpinus pubescens	1.446	20.18		16	Elaeagnus pungens	1.03	46.47	72.51	43.59	33.67	0.95	46.47	72.51	43.59	33.67	3.07	46.47	72.51	43.59	33.67	11.17	46.47	72.51	43.59	33.67
				18	Cudrania tricuspidata	49.592	65.62	24.38		17	Cinnamomum glanduliferum	20.565	44.69		17	Zanthoxylum planispinum Sieb.et Zucc.	1.31	59.23	79.85	30.36	43.68	0.78	59.23	79.85	30.36	43.68	2.43	59.23	79.85	30.36	43.68	2.88	59.23	79.85	30.36	43.68
				19	Zanthoxylum planispinum Sieb.et Zucc.	36.72	59.23	30.36		18	Cudrania tricuspidata	1.277	11.13		18	Pyracantha atalantioides	0.67	49.5	77.18	42.01	15.72	0.75	49.5	77.18	42.01	15.72	2.51	49.5	77.18	42.01	15.72	18.35	49.5	77.18	42.01	15.72
										19	Zanthoxylum planispinum Sieb.et Zucc.	10.625	43.68		19	Nothopanax davidii	0.94	52	78.99	39.65	11.44	0.55	52	78.99	39.65	11.44	3.29	52	78.99	39.65	11.44	2.86	52	78.99	39.65	11.44
															20	Clerodendrum mandarinorum	0.29	26.44	38.21	53.82	34.11	0.18	26.44	38.21	53.82	34.11	1.49	26.44	38.21	53.82	34.11	4.97	26.44	38.21	53.82	34.11
															21	Toddalia asiatica	1.68	59.03	81.47	31.81	36.06	0.92	59.03	81.47	31.81	36.06	2.85	59.03	81.47	31.81	36.06	13.18	59.03	81.47	31.81	36.06
															22	Tetradium glabrifolium	1.17	67.61	85.2	23.39	13.24	1	67.61	85.2	23.39	13.24	3.4	67.61	85.2	23.39	13.24	7.51	67.61	85.2	23.39	13.24
															23	Quercus aliena	0.92	49.39	75.69	41.3	14.69	0.23	49.39	75.69	41.3	14.69	3.16	49.39	75.69	41.3	14.69	10.18	49.39	75.69	41.3	14.69
															24	Vitex canescens	1.25	62.58	78.58	24.55	12.85	1.01	62.58	78.58	24.55	12.85	3.5	62.58	78.58	24.55	12.85	10.76	62.58	78.58	24.55	12.85
															25	Carpinus pubescens	1.64	59.19	77.54	28.56	20.18	0.91	59.19	77.54	28.56	20.18	3.38	59.19	77.54	28.56	20.18	9.13	59.19	77.54	28.56	20.18
															26	Platycarya longipes	1.05	54	78.03	36.33	25.14	0.8	54	78.03	36.33	25.14	2.32	54	78.03	36.33	25.14	10.65	54	78.03	36.33	25.14
															27	Cladrastis platycarpa	1.24	62.42	83.37	28.69	12.08	1.04	62.42	83.37	28.69	12.08	3.49	62.42	83.37	28.69	12.08	14.24	62.42	83.37	28.69	12.08
															28	Albizia kalkora (Roxb.)Prain	1.27	61.68	74.15	21.42	14.53	0.75	61.68	74.15	21.42	14.53	2.49	61.68	74.15	21.42	14.53	15.25	61.68	74.15	21.42	14.53
															29	Celtis sinensis	1.24	68.34	82.2	19.79	10.88	0.34	68.34	82.2	19.79	10.88	3.4	68.34	82.2	19.79	10.88	11.95	68.34	82.2	19.79	10.88
															30	Broussonetia papyifera	0.92	49.12	83.81	45.73	30.8	0.42	49.12	83.81	45.73	30.8	3.29	49.12	83.81	45.73	30.8	5.24	49.12	83.81	45.73	30.8
															31	Diospyros kaki var. silvestris	2.26	60.76	79.48	27.93	10.45	0.93	60.76	79.48	27.93	10.45	2.7	60.76	79.48	27.93	10.45	11.14	60.76	79.48	27.93	10.45
															32	Catalpa fargesii f. duclouxii	1.47	67.21	85.77	24.36	11.04	0.57	67.21	85.77	24.36	11.04	3.81	67.21	85.77	24.36	11.04	8.38	67.21	85.77	24.36	11.04
															33	Liquidambar formosana	0.64	21.51	45.7	71.1	32.96	0.2	21.51	45.7	71.1	32.96	1.37	21.51	45.7	71.1	32.96	15.27	21.51	45.7	71.1	32.96
															34	Swida wilsoniana	0.93	60.49	79.37	28.23	29.12	0.96	60.49	79.37	28.23	29.12	3.18	60.49	79.37	28.23	29.12	8.81	60.49	79.37	28.23	29.12
															35	Armeniaca mume	0.27	38.22	55.77	45.16	42.86	0.17	38.22	55.77	45.16	42.86	1.54	38.22	55.77	45.16	42.86	5.69	38.22	55.77	45.16	42.86
															36	Cudrania tricuspidata	1.25	65.62	83.22	24.38	11.13	0.65	65.62	83.22	24.38	11.13	3.38	65.62	83.22	24.38	11.13	7.86	65.62	83.22	24.38	11.13
															37	Rhamnella martinii	1.81	59.68	79.61	29.55	28.73	0.79	59.68	79.61	29.55	28.73	2.71	59.68	79.61	29.55	28.73	13.51	59.68	79.61	29.55	28.73
															38	Rhus chinensis	1.85	71.09	84.47	18.21	27.69	0.91	71.09	84.47	18.21	27.69	3.13	71.09	84.47	18.21	27.69	7.1	71.09	84.47	18.21	27.69
															39	Litsea cubeba	0.73	28.86	52.9	61.16	28.65	0.18	28.86	52.9	61.16	28.65	1.56	28.86	52.9	61.16	28.65	9.47	28.86	52.9	61.16	28.65
															40	Viburnum chinshanense	1.2	57.1	82.09	34.77	35.89	0.65	57.1	82.09	34.77	35.89	3.32	57.1	82.09	34.77	35.89	9.45	57.1	82.09	34.77	35.89
															41	Ligustrum sinense	0.54	31.85	52.88	55.53	22.49	0.29	31.85	52.88	55.53	22.49	1.46	31.85	52.88	55.53	22.49	7.39	31.85	52.88	55.53	22.49
															42	Evodia trichotoma (Lour.) Pierre var. pubescens Huang	0.68	30.14	38.03	40.77	21.91	0.62	30.14	38.03	40.77	21.91	1.04	30.14	38.03	40.77	21.91	4.55	30.14	38.03	40.77	21.91
