# Supplementary material for: Effects of root exudates of woody species on the soil anti-erodibility in the rhizosphere in a karst region, China
Source: PeerJ. 2017 Mar 1;5:e3029. doi: 10.7717/peerj.3029 (PMC5335692; doi:10.7717/peerj.3029)
Supplement: Supplemental Information 6 [file peerj-05-3029-s006.xlsx]

## Sheet: table 6
No.	Tree species	The anti-erodibility of soils	Aggreation status(%)	Degree of aggregation (%)	Dispersion ratio(%)	Dispersion coefficient(%)	No.	Tree species	Biological active matters	Total soluble sugar	Total amino acids	Phenolic compound	Free amino acid	No.	Tree species	the organic matters identified by GC-MS	Hydrocarbon	Amides	Alcohols	Phenolic ether	Aldehyde	Acids	Ketone	Esters	Others	Total
1	Ligustrum lucidum	average of three sample tree	48.63	73.8	41.22	39.29	1	Ligustrum lucidum	average of three sample tree	1.11	0.24	3.39	12.38	1	Cladrastis platycarpa	mixed samples of the rhizospere soils of the three sample trees	31.849	11.914	3.102	9.729	1.728		1.138	27.513	1.724	88.697
2	Ilex chinensis		64.47	82.06	24.95	22.6	2	Ilex chinensis		1.59	0.36	3.02	16.7	2	Ilex chinensis		38.882	0.835	6.426	1.962	1.858	21.468	1.295	14.305	4.731	91.762
3	Cinnamomum glanduliferum		56.69	80.6	34.35	44.69	3	Cinnamomum glanduliferum		1.51	0.36	2.76	12.1	3	Rhamnella martinii		44.608	2.764	11.7	2.031	0.926		6.323	11.465	4.274	84.091
4	Machilus microcarpa		59.84	71.31	21.19	29.96	4	Machilus microcarpa		0.64	0.39	1.42	15.58	4	Toddalia asiatica		48.369		7.182	20.147	0.228	1.763	1.035	12.735	0.546	92.005
5	Lithocarpus glaber (Thunb.) Nakai		33.09	40.81	36.37	27.02	5	Lithocarpus glaber (Thunb.) Nakai		0.5	0.33	0.96	11.25	5	Swida wilsoniana		41.099	4.919	19.119	3.125	1.488	3.798	5.521	6.698	1.655	87.422
6	Cyclobalanopsis glauca		35.14	45.14	38.66	26.56	6	Cyclobalanopsis glauca		0.64	0.41	1.58	6.03	6	Vitex canescens		36.491	8.388	10.024	1.285	1.905	0.159	6.772	7.716	3.085	75.825
7	Lithocarpus confinis Huang		40.17	54.16	39.15	22.47	7	Lithocarpus confinis Huang		0.51	0.25	0.81	12.1	7	Pyracantha atalantioides		34.897	5.052	11.145	12.518	1.191	2.962	3.941	6.222	1.563	79.491
8	Diospyros cathayensis		70.49	84.57	19.1	23.46	8	Diospyros cathayensis		0.86	0.53	3.7	8.46	8	Ilex corallina		44.056	0.441	33.554	1.122	1.062	2.332	2.1	4.118	1.314	90.099
9	Cyclobalanopsis gracilis		53.09	79.87	38.72	39.77	9	Cyclobalanopsis gracilis		1.11	0.84	3.08	3.28	9	Diospyros cathayensis		49.662	1.871	14.412	2.381	0.233	1.785	3.745	6.758	3.785	84.632
10	Itea yunnanensis		60.78	81.61	29.57	19.51	10	Itea yunnanensis		1.49	0.24	2.71	17.97	10	Cyclobalanopsis gracilis		31.291	7.642	9.369	2.041	1.675	0.174	8.302	5.416	2.998	68.908
11	Ilex corallina		69.42	80.86	16.93	12.99	11	Ilex corallina		1.95	0.94	3.13	9.34	11	Lindera communis		31.873	3.969	15.294	3.299	1.401	0.163	4.401	4.115	2.768	67.283
12	Lindera communis		48.07	83.76	46.99	20.69	12	Lindera communis		0.8	0.51	2.46	11.16	12	Ligustrum sinense		29.312	6.599	20.801	1.588	1.079	2.359	5.577	7.721	1.33	76.366
13	Mallotus philippensis		38.82	52.38	40	29.63	13	Mallotus philippensis		0.27	0.2	0.88	7.11	13	Diospyros kaki var. silvestris		18.984	1.674	21.807	13.578	0.675	1.483	11.701	4.687	1.925	76.514
14	tea chinensis Hook.et Arn.var.oblonga		27.97	51.1	61.81	30.56	14	tea chinensis Hook.et Arn.var.oblonga		0.66	0.2	1.24	13.94	14	Nothopanax davidii		40.236	4.411	14.861	4.794	2.609	1.701	3.211	4.839	4.551	81.213
15	Ilex memecylifolia		22.77	37.35	63.16	31.34	15	Ilex memecylifolia		0.49	0.3	1.61	9.72	15	Platycarya longipes		37.075	5.216	22.112	7.161	0.465	0.872	1.384	4.577	2.672	81.534
16	Elaeagnus pungens		46.47	72.51	43.59	33.67	16	Elaeagnus pungens		1.03	0.95	3.07	11.17	16	Carpinus pubescens		37.085	8.611	15.355	1.446	0.721	4.35	4.927	6.868	5.255	84.618
17	Zanthoxylum planispinum Sieb.et Zucc.		59.23	79.85	30.36	43.68	17	Zanthoxylum planispinum Sieb.et Zucc.		1.31	0.78	2.43	2.88	17	Cinnamomum glanduliferum		26.105	1.039	13.99	20.565	2.046	1.989	4.295	6.15	1.29	77.469
18	Pyracantha atalantioides		49.5	77.18	42.01	15.72	18	Pyracantha atalantioides		0.67	0.75	2.51	18.35	18	Cudrania tricuspidata		49.592	1.927	14.584	1.277	1.414	2.588	2.506	9.516	4.388	87.792
19	Nothopanax davidii		52	78.99	39.65	11.44	19	Nothopanax davidii		0.94	0.55	3.29	2.86	19	Zanthoxylum planispinum Sieb.et Zucc.		36.72	1.254	12.238	10.625	1.067	3.698	2.112	13.747	2.936	84.397
20	Clerodendrum mandarinorum		26.44	38.21	53.82	34.11	20	Clerodendrum mandarinorum		0.29	0.18	1.49	4.97		Maximum (%)		49.66	11.91	33.55	20.57	2.61	21.47	11.7	27.51	5.26	92.01
21	Toddalia asiatica		59.03	81.47	31.81	36.06	21	Toddalia asiatica		1.68	0.92	2.85	13.18		Minimum (%)		18.98	0.44	3.1	1.12	0.23	0.16	1.04	4.12	0.55	67.28
22	Tetradium glabrifolium		67.61	85.2	23.39	13.24	22	Tetradium glabrifolium		1.17	1	3.4	7.51		Mean		37.2729	4.36256	14.5829	6.35126	1.25111	3.15553	4.22558	8.69295	2.77842	82.1115
23	Quercus aliena		49.39	75.69	41.3	14.69	23	Quercus aliena		0.92	0.23	3.16	10.18		Variance		65.4319	10.5388	47.5719	40.715	0.405923	23.8301	7.61522	31.2181	1.95157	50.4483
24	Vitex canescens		62.58	78.58	24.55	12.85	24	Vitex canescens		1.25	1.01	3.5	10.76		Standard deviation		8.089	3.24635	6.89724	6.38083	0.637121	4.88161	2.75957	5.58732	1.39699	7.1027
25	Carpinus pubescens		59.19	77.54	28.56	20.18	25	Carpinus pubescens		1.64	0.91	3.38	9.13		Coefficient of variation		21.7021	74.414	47.2968	100.465	50.9246	154.7	65.3063	64.2741	50.2798	8.65007
26	Platycarya longipes		54	78.03	36.33	25.14	26	Platycarya longipes		1.05	0.8	2.32	10.65		CVu		1.20112	1.19989	1.20005	1.19983	1.20002	1.1998	1.19992	1.19992	1.20002	1.2082
27	Cladrastis platycarpa		62.42	83.37	28.69	12.08	27	Cladrastis platycarpa		1.24	1.04	3.49	14.24
28	Albizia kalkora (Roxb.)Prain		61.68	74.15	21.42	14.53	28	Albizia kalkora (Roxb.)Prain		1.27	0.75	2.49	15.25
29	Celtis sinensis		68.34	82.2	19.79	10.88	29	Celtis sinensis		1.24	0.34	3.4	11.95
30	Broussonetia papyifera		49.12	83.81	45.73	30.8	30	Broussonetia papyifera		0.92	0.42	3.29	5.24
31	Diospyros kaki var. silvestris		60.76	79.48	27.93	10.45	31	Diospyros kaki var. silvestris		2.26	0.93	2.7	11.14
32	Catalpa fargesii f. duclouxii		67.21	85.77	24.36	11.04	32	Catalpa fargesii f. duclouxii		1.47	0.57	3.81	8.38
33	Liquidambar formosana		21.51	45.7	71.1	32.96	33	Liquidambar formosana		0.64	0.2	1.37	15.27
34	Swida wilsoniana		60.49	79.37	28.23	29.12	34	Swida wilsoniana		0.93	0.96	3.18	8.81
35	Armeniaca mume		38.22	55.77	45.16	42.86	35	Armeniaca mume		0.27	0.17	1.54	5.69
36	Cudrania tricuspidata		65.62	83.22	24.38	11.13	36	Cudrania tricuspidata		1.25	0.65	3.38	7.86
37	Rhamnella martinii		59.68	79.61	29.55	28.73	37	Rhamnella martinii		1.81	0.79	2.71	13.51
38	Rhus chinensis		71.09	84.47	18.21	27.69	38	Rhus chinensis		1.85	0.91	3.13	7.1
39	Litsea cubeba		28.86	52.9	61.16	28.65	39	Litsea cubeba		0.73	0.18	1.56	9.47
40	Viburnum chinshanense		57.1	82.09	34.77	35.89	40	Viburnum chinshanense		1.2	0.65	3.32	9.45
41	Ligustrum sinense		31.85	52.88	55.53	22.49	41	Ligustrum sinense		0.54	0.29	1.46	7.39
42	Evodia trichotoma (Lour.) Pierre var. pubescens Huang		30.14	38.03	40.77	21.91	42	Evodia trichotoma (Lour.) Pierre var. pubescens Huang		0.68	0.62	1.04	4.55
	Maximum (%)		71.09	85.77	71.1	44.69		Maximum (g/kg)		2.26	1.04	3.81	0.01835
	Minimum (%)		21.51	37.35	16.93	10.45		Minimum (g/kg)		0.27	0.17	0.81	0.00286
	Mean		51.166	70.606	36.2933	25.0602		Mean		1.05667	0.563095	2.52429	10.0967
	Variance		209.487	250.886	175.692	100.797		Variance		0.233706	0.0868121	0.817898	15.7681
	Standard deviation		14.4737	15.8394	13.2549	10.0398		Standard deviation		0.483431	0.294639	0.904377	3.97091
	Coefficient of variation		28.2877	22.4335	36.5215	40.0626		Coefficient of variation		45.7506	52.3249	35.8271	39.3289
	CVu		1.16512	1.16556	1.16482	1.16474		CVu		1.16466	1.16459	1.16484	1.16476
