# Supplementary material for: Effects of root exudates of woody species on the soil anti-erodibility in the rhizosphere in a karst region, China
Source: PeerJ. 2017 Mar 1;5:e3029. doi: 10.7717/peerj.3029 (PMC5335692; doi:10.7717/peerj.3029)
Supplement: Supplemental Information 7 [file peerj-05-3029-s007.xlsx]

## Sheet: Table 7
	1	2	3	4	5	6	7	8	9	10	11	12	13	14
Tree species	Aggregation status	Degree of aggregation	Dispersion ratio	Dispersion coefficient	Hydrocarbon	Amides	Alcohols	Phenolic ether	Aldehyde	Acids	Ketone	Esters	Others	Total
		%	%	%																列 1	列 2	列 3	列 4	列 5	列 6	列 7	列 8	列 9	列 10	列 11	列 12	列 13	列 14	列 15	列 16	列 17
Cladrastis platycarpa	62.42	83.37	28.69	12.08	31.849	11.914	3.102	9.729	1.728		1.138	27.513	1.724	88.697					列 1	1
Ilex chinensis	64.47	82.06	24.95	22.6	38.882	0.835	6.426	1.962	1.858	21.468	1.295	14.305	4.731	91.762					列 2	0.281665	1
Rhamnella martinii	59.68	79.61	29.55	28.73	44.608	2.764	11.7	2.031	0.926		6.323	11.465	4.274	84.091					列 3	0.122671	-0.10156	1
Toddalia asiatica	59.03	81.47	31.81	36.06	48.369		7.182	20.147	0.228	1.763	1.035	12.735	0.546	92.005					列 4	0.0974791	0.13747	0.773528	1
Swida wilsoniana	60.49	79.37	28.23	29.12	41.099	4.919	19.119	3.125	1.488	3.798	5.521	6.698	1.655	87.422					列 5	-0.108714	0.19137	-0.978429	-0.632584	1
Vitex canescens	62.58	78.58	24.55	12.85	36.491	8.388	10.024	1.285	1.905	0.159	6.772	7.716	3.085	75.825					列 6	-0.552328	0.43043	-0.125765	0.00422582	0.158125	1
Pyracantha atalantioides	49.5	77.18	42.01	15.72	34.897	5.052	11.145	12.518	1.191	2.962	3.941	6.222	1.563	79.491					列 7	-0.0858312	-0.0918541	0.47061	0.311685	-0.461576	-0.0346414	1
Ilex corallina	69.42	80.86	16.93	12.99	44.056	0.441	33.554	1.122	1.062	2.332	2.1	4.118	1.314	90.099					列 8	-0.259973	-0.537926	-0.299589	-0.229417	0.286935	-0.203868	-0.222959	1
Diospyros cathayensis	70.49	84.57	19.1	23.46	49.662	1.871	14.412	2.381	0.233	1.785	3.745	6.758	3.785	84.632					列 9	0.331661	0.0279758	-0.0358163	-0.268256	-0.0595136	-0.222919	-0.0454274	-0.395005	1
Cyclobalanopsis gracilis	53.09	79.87	38.72	39.77	31.291	7.642	9.369	2.041	1.675	0.174	8.302	5.416	2.998	68.908					列 10	-0.193324	0.214823	-0.0549639	0.145466	0.116081	0.385646	-0.313364	-0.165358	-0.224159	1
Lindera communis	48.07	83.76	46.99	20.69	31.873	3.969	15.294	3.299	1.401	0.163	4.401	4.115	2.768	67.283					列 11	0.195639	0.201052	-0.126157	0.0488544	0.164041	-0.111706	-0.243992	0.154577	-0.257338	-0.12673	1
Ligustrum sinense	31.85	52.88	55.53	22.49	29.312	6.599	20.801	1.588	1.079	2.359	5.577	7.721	1.33	76.366					列 12	0.376283	0.364831	0.219714	0.0826291	-0.232618	-0.00293946	0.107266	-0.324839	-0.305128	-0.156597	0.189091	1
Diospyros kaki var. silvestris	60.76	79.48	27.93	10.45	18.984	1.674	21.807	13.578	0.675	1.483	11.701	4.687	1.925	76.514					列 13	-0.0393947	-0.175745	-0.182394	-0.211861	0.134581	-0.0617065	-0.549756	0.0746745	0.166308	-0.0960971	0.0023772	-0.328965	1
Nothopanax davidii	52	78.99	39.65	11.44	40.236	4.411	14.861	4.794	2.609	1.701	3.211	4.839	4.551	81.213					列 14	-0.230258	-0.164762	0.218772	0.156588	-0.192752	0.00746807	0.0822846	0.361225	-0.644807	0.166976	0.0900249	0.602982	-0.42777	1
Platycarya longipes	54	78.03	36.33	25.14	37.075	5.216	22.112	7.161	0.465	0.872	1.384	4.577	2.672	81.534					列 15	0.256311	-0.155412	0.248333	0.237522	-0.231736	-0.201401	0.309732	-0.0465107	-0.20806	-0.591966	0.174756	0.370491	-0.00452012	-0.0350137	1
Carpinus pubescens	59.19	77.54	28.56	20.18	37.085	8.611	15.355	1.446	0.721	4.35	4.927	6.868	5.255	84.618					列 16	0.118604	-0.0618579	0.5756	0.237636	-0.615841	-0.0920465	0.624352	-0.210426	-0.0493576	0.0579583	-0.213941	0.494186	-0.621428	0.493659	0.0579457	1
Cinnamomum glanduliferum	56.69	80.6	34.35	44.69	26.105	1.039	13.99	20.565	2.046	1.989	4.295	6.15	1.29	77.469					列 17	0.203786	-0.0165735	0.483795	0.21821	-0.530185	-0.118942	-0.155099	-0.110586	0.0484313	0.104559	-0.128007	0.488994	0.0600418	0.168981	-0.158547	0.321297	1
Cudrania tricuspidata	65.62	83.22	24.38	11.13	49.592	1.927	14.584	1.277	1.414	2.588	2.506	9.516	4.388	87.792
Zanthoxylum planispinum Sieb.et Zucc.	59.23	79.85	30.36	43.68	36.72	1.254	12.238	10.625	1.067	3.698	2.112	13.747	2.936	84.397
No.	Tree species	Aggregation status	Degree of aggregation	Dispersion ratio	Dispersion coefficient	Total soluble sugar	Total amino acids	Phenolic compound	Free amino acid
		%	%	%	%	(g/kg)	(g/kg)	(g/kg)	(g/kg)
1	Ligustrum lucidum	48.63	73.8	41.22	39.29	1.11	0.24	3.39	12.38
2	Ilex chinensis	64.47	82.06	24.95	22.6	1.59	0.36	3.02	16.7
3	Cinnamomum glanduliferum	56.69	80.6	34.35	44.69	1.51	0.36	2.76	12.1
4	Machilus microcarpa	59.84	71.31	21.19	29.96	0.64	0.39	1.42	15.58
5	Lithocarpus glaber (Thunb.) Nakai	33.09	40.81	36.37	27.02	0.5	0.33	0.96	11.25
6	Cyclobalanopsis glauca	35.14	45.14	38.66	26.56	0.64	0.41	1.58	6.03
7	Lithocarpus confinis Huang	40.17	54.16	39.15	22.47	0.51	0.25	0.81	12.1
8	Diospyros cathayensis	70.49	84.57	19.1	23.46	0.86	0.53	3.7	8.46
9	Cyclobalanopsis gracilis	53.09	79.87	38.72	39.77	1.11	0.84	3.08	3.28
10	Itea yunnanensis	60.78	81.61	29.57	19.51	1.49	0.24	2.71	17.97
11	Ilex corallina	69.42	80.86	16.93	12.99	1.95	0.94	3.13	9.34
12	Lindera communis	48.07	83.76	46.99	20.69	0.8	0.51	2.46	11.16
13	Mallotus philippensis	38.82	52.38	40	29.63	0.27	0.2	0.88	7.11
14	tea chinensis Hook.et Arn.var.oblonga	27.97	51.1	61.81	30.56	0.66	0.2	1.24	13.94
15	Ilex memecylifolia	22.77	37.35	63.16	31.34	0.49	0.3	1.61	9.72
16	Elaeagnus pungens	46.47	72.51	43.59	33.67	1.03	0.95	3.07	11.17
17	Zanthoxylum planispinum Sieb.et Zucc.	59.23	79.85	30.36	43.68	1.31	0.78	2.43	2.88
18	Pyracantha atalantioides	49.5	77.18	42.01	15.72	0.67	0.75	2.51	18.35
19	Nothopanax davidii	52	78.99	39.65	11.44	0.94	0.55	3.29	2.86
20	Clerodendrum mandarinorum	26.44	38.21	53.82	34.11	0.29	0.18	1.49	4.97
21	Toddalia asiatica	59.03	81.47	31.81	36.06	1.68	0.92	2.85	13.18
22	Tetradium glabrifolium	67.61	85.2	23.39	13.24	1.17	1	3.4	7.51
23	Quercus aliena	49.39	75.69	41.3	14.69	0.92	0.23	3.16	10.18
24	Vitex canescens	62.58	78.58	24.55	12.85	1.25	1.01	3.5	10.76
25	Carpinus pubescens	59.19	77.54	28.56	20.18	1.64	0.91	3.38	9.13
26	Platycarya longipes	54	78.03	36.33	25.14	1.05	0.8	2.32	10.65
27	Cladrastis platycarpa	62.42	83.37	28.69	12.08	1.24	1.04	3.49	14.24
28	Albizia kalkora (Roxb.)Prain	61.68	74.15	21.42	14.53	1.27	0.75	2.49	15.25
29	Celtis sinensis	68.34	82.2	19.79	10.88	1.24	0.34	3.4	11.95
30	Broussonetia papyifera	49.12	83.81	45.73	30.8	0.92	0.42	3.29	5.24
31	Diospyros kaki var. silvestris	60.76	79.48	27.93	10.45	2.26	0.93	2.7	11.14
32	Catalpa fargesii f. duclouxii	67.21	85.77	24.36	11.04	1.47	0.57	3.81	8.38
33	Liquidambar formosana	21.51	45.7	71.1	32.96	0.64	0.2	1.37	15.27
34	Swida wilsoniana	60.49	79.37	28.23	29.12	0.93	0.96	3.18	8.81
35	Armeniaca mume	38.22	55.77	45.16	42.86	0.27	0.17	1.54	5.69
36	Cudrania tricuspidata	65.62	83.22	24.38	11.13	1.25	0.65	3.38	7.86
37	Rhamnella martinii	59.68	79.61	29.55	28.73	1.81	0.79	2.71	13.51
38	Rhus chinensis	71.09	84.47	18.21	27.69	1.85	0.91	3.13	7.1
39	Litsea cubeba	28.86	52.9	61.16	28.65	0.73	0.18	1.56	9.47
40	Viburnum chinshanense	57.1	82.09	34.77	35.89	1.2	0.65	3.32	9.45
41	Ligustrum sinense	31.85	52.88	55.53	22.49	0.54	0.29	1.46	7.39
42	Evodia trichotoma (Lour.) Pierre var. pubescens Huang	30.14	38.03	40.77	21.91	0.68	0.62	1.04	4.55
				correlation analysis of data of two table
	Aggregation status			Degree of aggregation			Dispersion ratio			Dispersion coefficient
	r	p	n	r	p	n	r	p	n	r	p	n
Hydrocarbon	0.47	＜0.05	19	0.31	＞0.05	19	-0.46	＜0.05	19	-0.03	＞0.05	19
Amides	-0.3	＜0.10	19	-0.23	＞0.05	19	0.29	＞0.05	19	-0.2	＞0.05	19
Alcohols	-0.04	＞0.05	19	-0.27	＞0.05	19	-0.06	＞0.05	19	-0.22	＞0.05	19
Phenolic ether	-0.05	＞0.05	19	0.15	＞0.05	19	0.12	＞0.05	19	0.39	＜0.10	19
Aldehyde	-0.13	＞0.05	19	0.05	＞0.05	19	0.16	＞0.05	19	-0.11	＞0.05	19
Acids	0.22	＞0.05	19	0.08	＞0.05	19	-0.23	＞0.05	19	0	＞0.05	19
Ketone	-0.18	＞0.05	19	-0.21	＞0.05	19	0.13	＞0.05	19	-0.06	＞0.05	19
Esters	0.22	＞0.05	19	0.16	＞0.05	19	-0.19	＞0.05	19	0.01	＞0.05	19
Others	0.25	＞0.05	19	0.24	＞0.05	19	-0.23	＞0.05	19	-0.2	＞0.05	19
Total soluble sugar	0.75	＜0.001	42	0.71	＜0.001	42	-0.63	＜0.001	42	-0.27	＜0.10	42
Total amino acids	0.62	＜0.001	42	0.57	＜0.001	42	-0.57	＜0.001	42	-0.28	＜0.10	42
Phenolic compound	0.8	＜0.001	42	0.87	＜0.001	42	-0.58	＜0.001	42	-0.32	＜0.05	42
Free amino acid	0.13	＞0.10	42	0.14	＞0.10	19	-0.07	＞0.05	19	-0.18	＞0.10	19
